# Supplementary material for: Antibody-Dependent Respiratory Burst against Plasmodium falciparum Merozoites in Individuals Living in an Area with Declining Malaria Transmission
Source: MDPI journal article supplement (doi:10.3390/vaccines12020203), 2024-02-16
Supplement: s1 [file s1]

Table S1. Distribution of study participants by their ADRB status in age categories

| Age groups<br>(years) | High malaria transmission |                      |            | Low malaria transmission |                      |            |
|-----------------------|---------------------------|----------------------|------------|--------------------------|----------------------|------------|
|                       | ADRB<br>positive (n)      | ADRB<br>negative (n) | Total      | ADRB positive<br>(n)     | ADRB negative<br>(n) | Total      |
| 0-4                   | 2                         | 8                    | 10         | 1                        | 12                   | 13         |
| 5-8                   | 4                         | 21                   | 25         | 0                        | 27                   | 27         |
| 9-12                  | 11                        | 12                   | 23         | 5                        | 23                   | 28         |
| 13-16                 | 11                        | 11                   | 22         | 1                        | 22                   | 23         |
| 17-20                 | 4                         | 6                    | 10         | 3                        | 13                   | 16         |
| 21-25                 | 9                         | 10                   | 19         | 4                        | 10                   | 14         |
| 26-30                 | 7                         | 2                    | 9          | 3                        | 8                    | 11         |
| 31-35                 | 6                         | 5                    | 11         | 2                        | 7                    | 9          |
| 36-40                 | 7                         | 6                    | 13         | 4                        | 8                    | 12         |
| >40                   | 11                        | 5                    | 16         | 6                        | 12                   | 18         |
| <b>Total</b>          | <b>72</b>                 | <b>86</b>            | <b>158</b> | <b>29</b>                | <b>142</b>           | <b>171</b> |
