# Supplementary figures and images for: Antibody-Dependent Respiratory Burst against Plasmodium falciparum Merozoites in Individuals Living in an Area with Declining Malaria Transmission
Source: MDPI journal article supplement (doi:10.3390/vaccines12020203), 2024-02-16

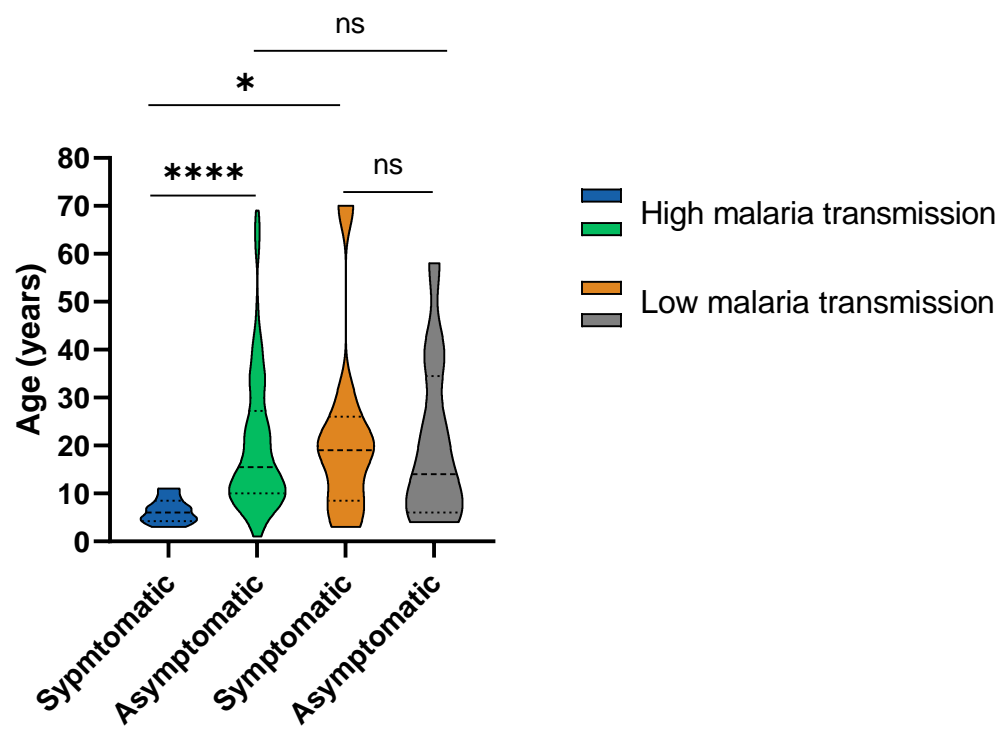

Supplement: s1 [file s1]
